# Supplementary material
Source: Springer Nature journal article supplement (https://www.springermedizin.de/resource/supplementary/12958_2003_79_MOESM1_ESM.pdf/9566352)
Supplement: MOESM1 [file 9566352]

**A.**

|               |                                                                 |
|---------------|-----------------------------------------------------------------|
| <b>attB</b>   | GCGGTGCGGGTGCCAGGGCGTGCCCTT                                     |
| <b>Embryo</b> | GCGGTGCGGGTGCCAGGGCGTGCCCTT <u>GAT</u> ACCCAAAGGCCCTATTAATTTAGG |
| <b>mpsL1</b>  | TCTGAGTAGTACCCTGGCTTTCCTATTGACACCCAAAGGCCCTATTAATTTAGG          |

**B.**

|              |                                           |
|--------------|-------------------------------------------|
| <b>mpsL1</b> | TAGTACCCTGGCTTTCCTATTGACACCCAAAGGCCCTATT  |
| <b>mpsT1</b> | CTCCACCACAAGGTTTCCATTAGAAAAGCCCCGGGCTCCCA |
| <b>attP</b>  | GCCCCAACTGGGGTAACCTTTGAGTTCTCTCAGTTGGGGG  |
